# Supplementary material
Source: publisher figshare collection journal article supplement (https://sage.figshare.com/ndownloader/files/17830049)
Supplement: Supplementary file 1 [file 17830049]

## Supplementary Materials

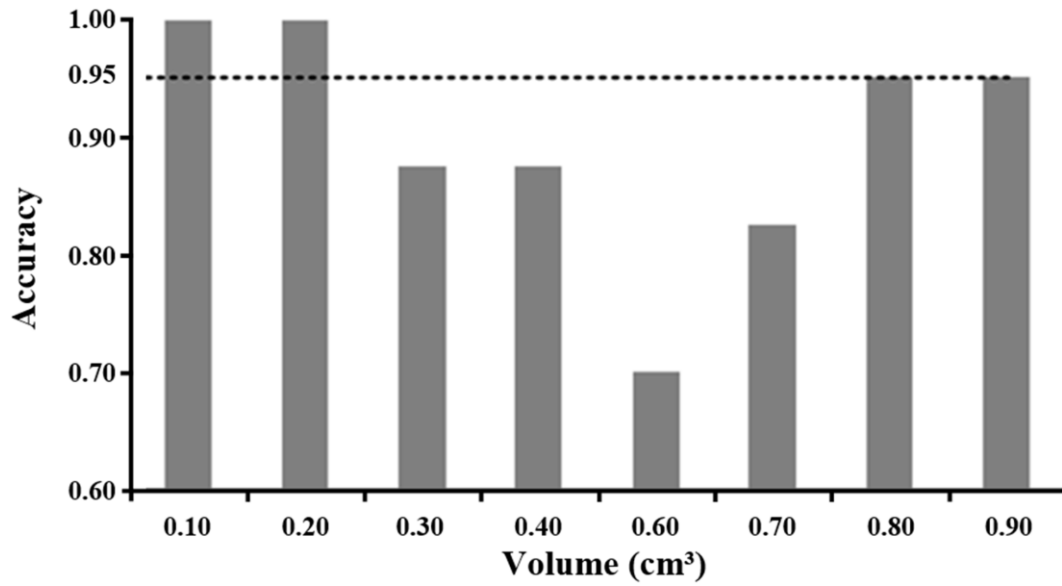

**Fig. 1** The accuracy of passive tactile volume perception of pinky finger for equally spaced eight stimuli (volume: 0.1, 0.2, 0.3, 0.4, 0.6, 0.7, 0.8, and 0.9 cm<sup>3</sup>) in preliminary experiment.

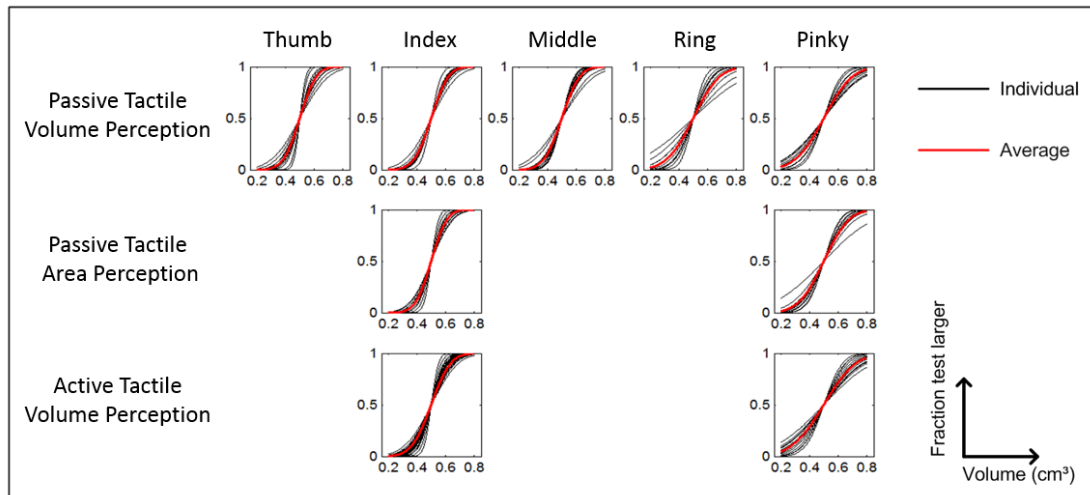

**Fig. 2** Average (red) and individual (black) function curves of all conditions.
